# Supplementary material for: Charge Trap States of SiC Power TrenchMOS Transistor under Repetitive Unclamped Inductive Switching Stress
Source: MDPI journal article supplement (doi:10.3390/ma15228230), 2022-11-19
Supplement: s1 [file s1]

Supplementary material

# Charge Trap States of SiC Power TrenchMOS Transistor under Repetitive UIS Stress

Juraj Marek <sup>1,\*</sup>, Jozef Kozarik <sup>1,2</sup>, Michal Minarik <sup>1</sup>, Ales Chvala <sup>1</sup>, Matej Matus <sup>1</sup>, Martin Donoval <sup>1</sup>,  
Lubica Stuchlikova <sup>1</sup> and Martin Weis <sup>1</sup>

<sup>1</sup> Institute of Electronics and Photonics, Slovak University of Technology in Bratislava, Ilkovičova 3, 812 19 Bratislava, Slovakia

<sup>2</sup> NanoDesign, s.r.o, Drotárska 19a, 811 04 Bratislava, Slovakia

\* Correspondence: juraj.marek@stuba.sk

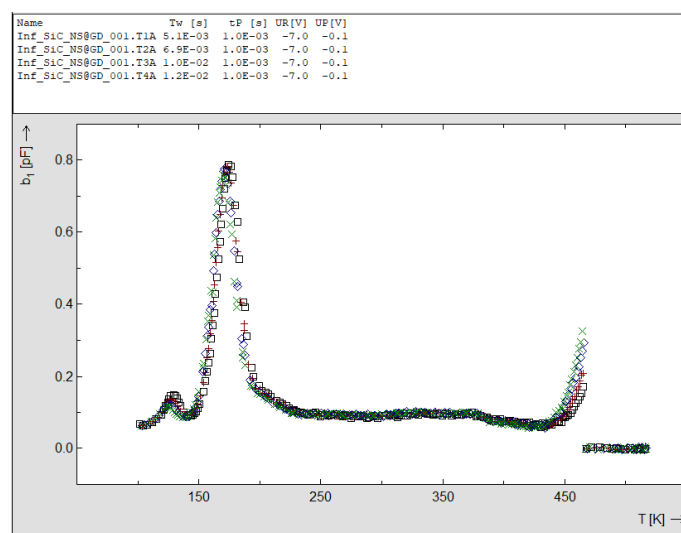

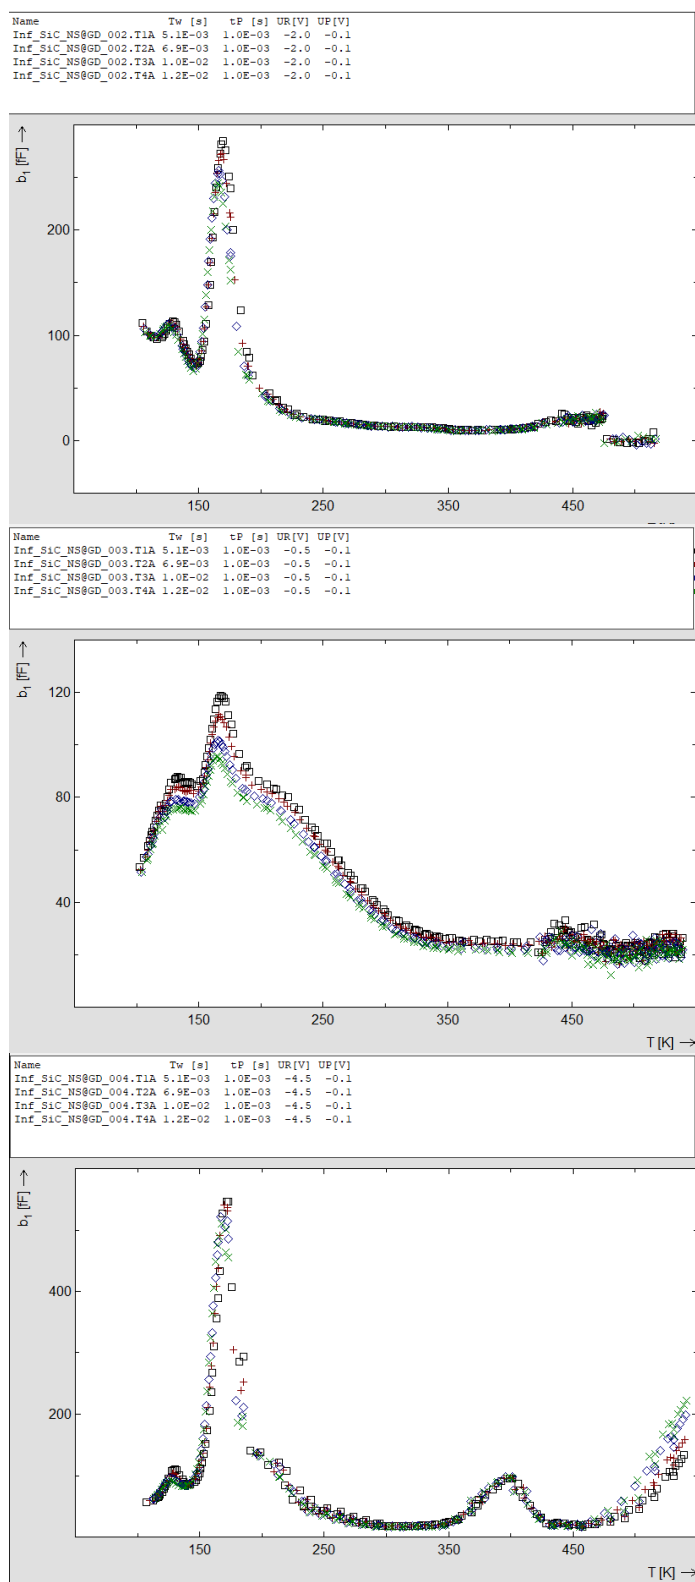

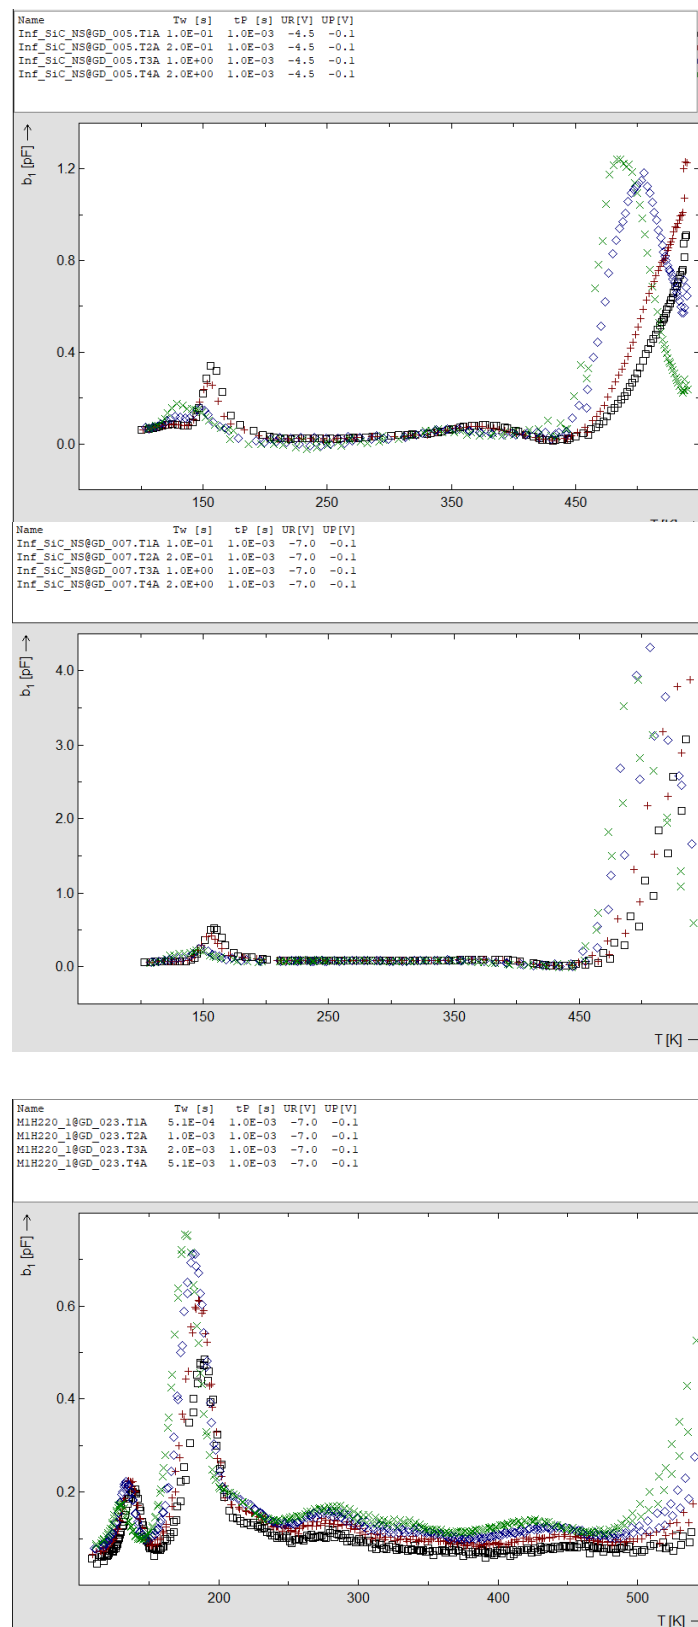

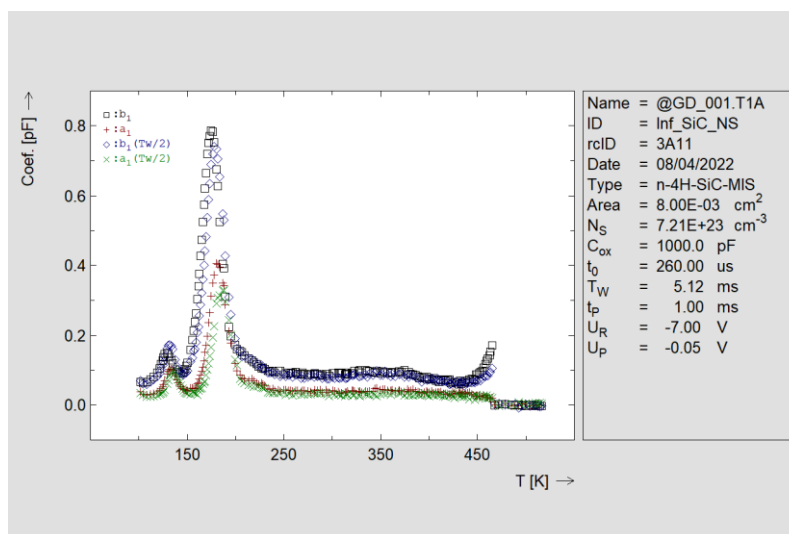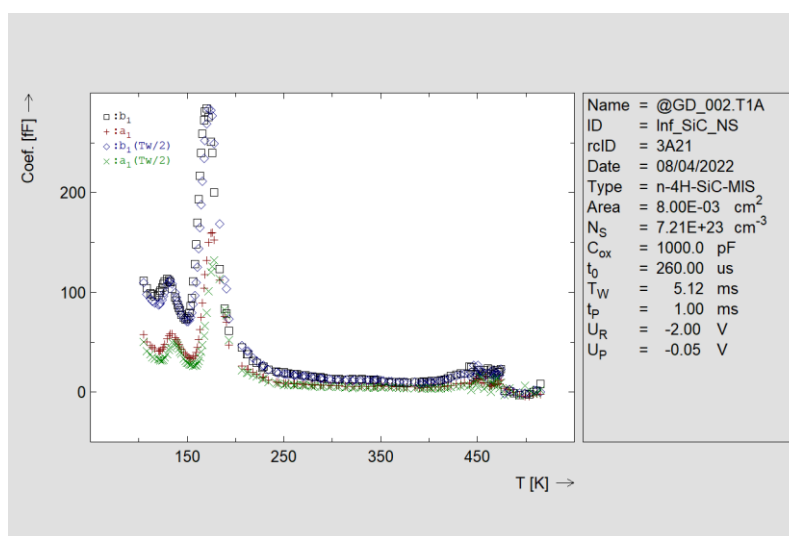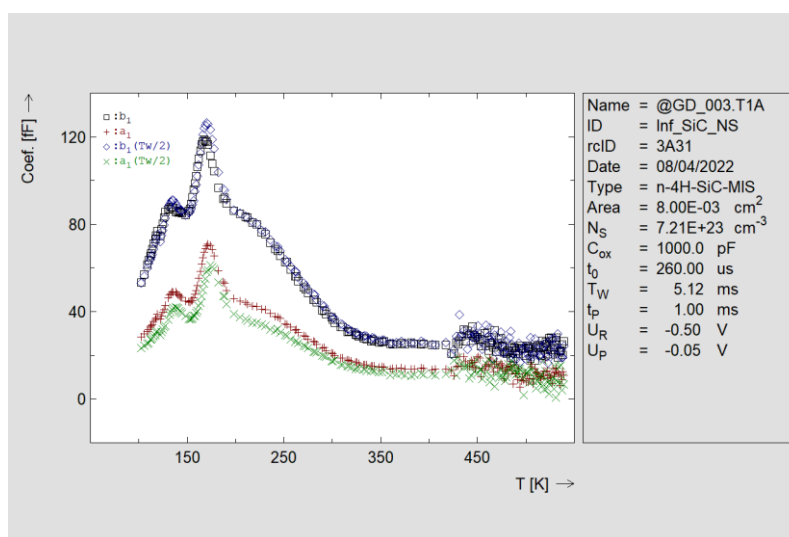

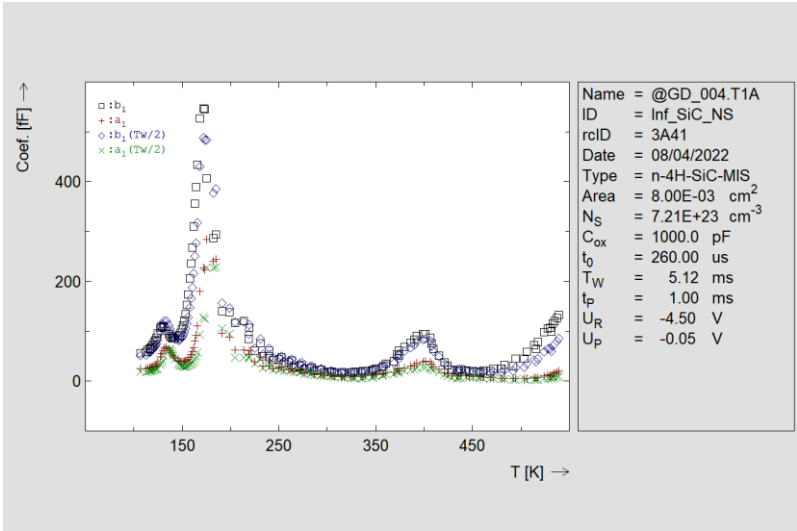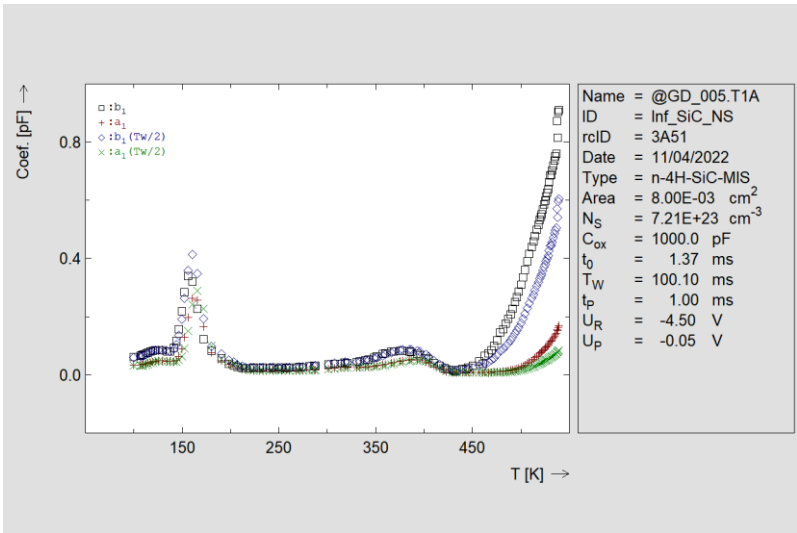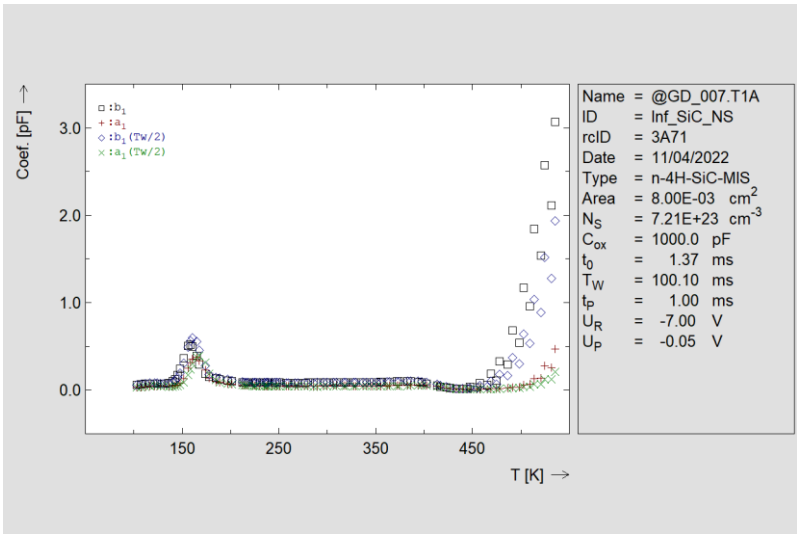

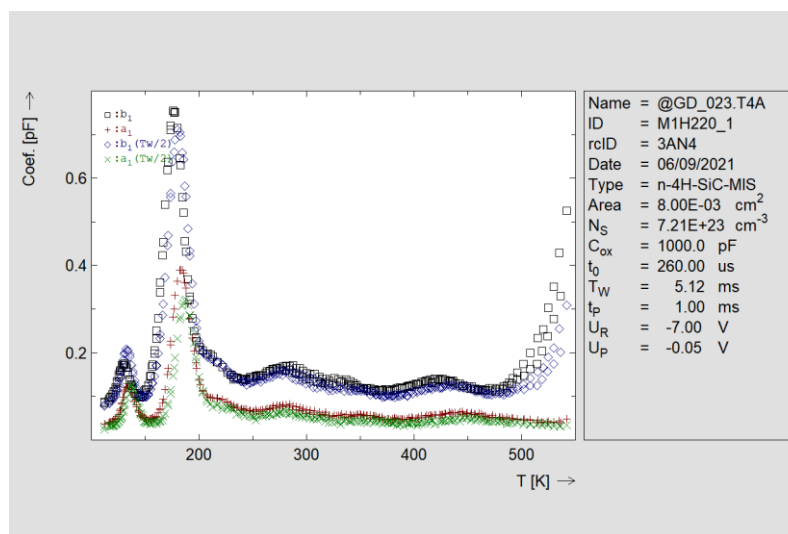

Measurements on virgin samples

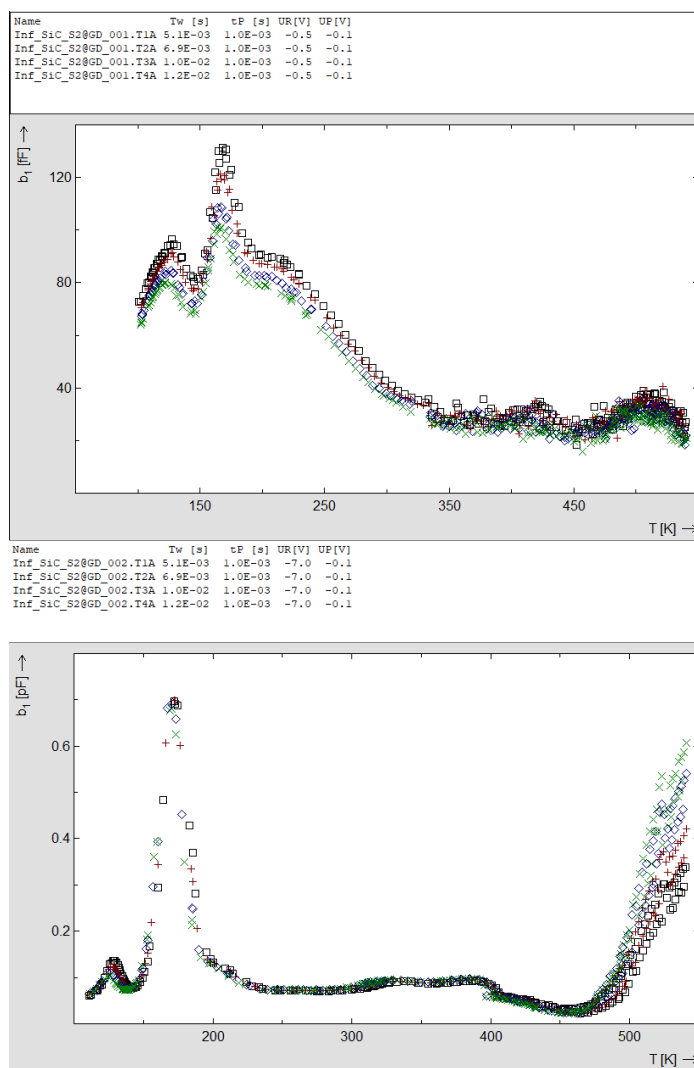

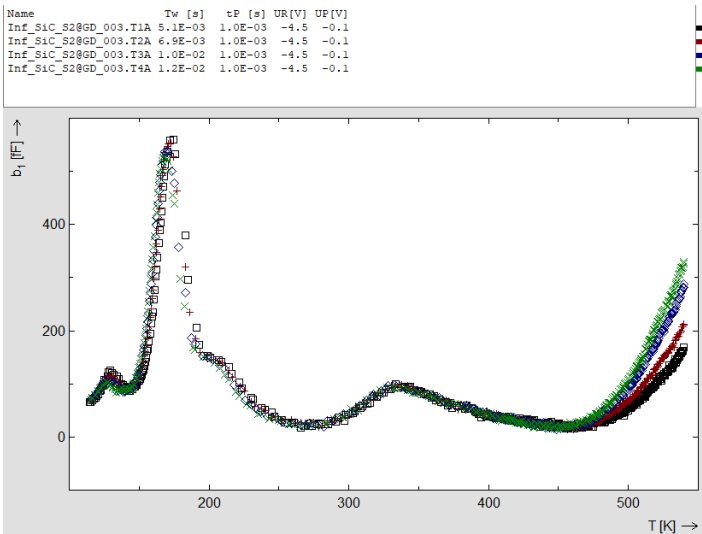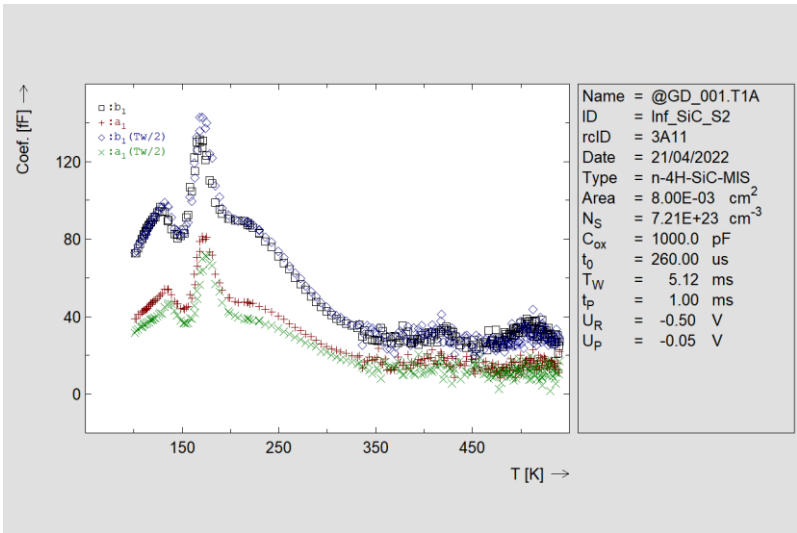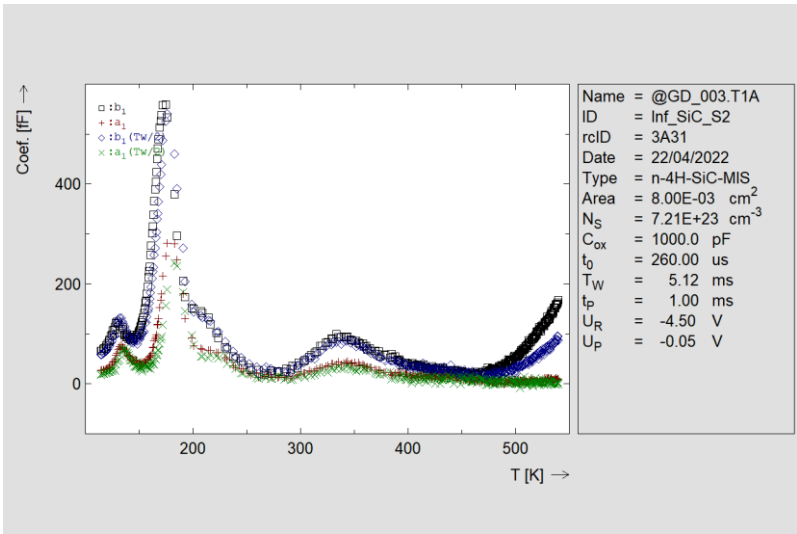

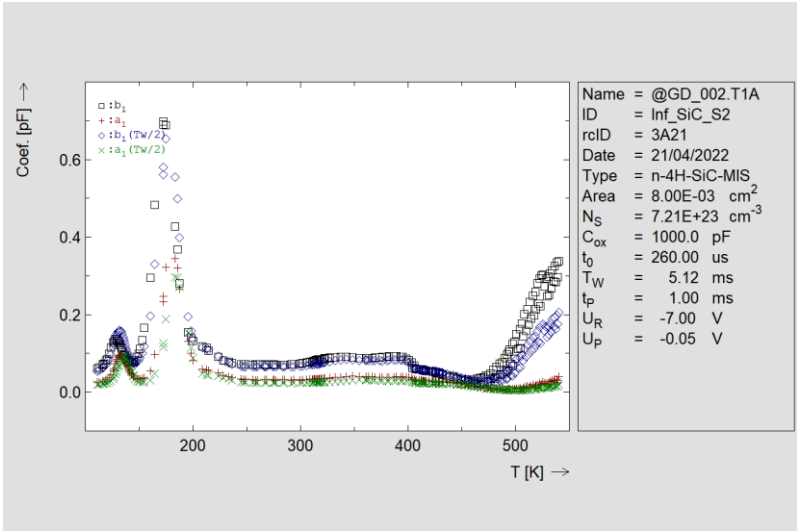

Measurements after 1 h of UISstress

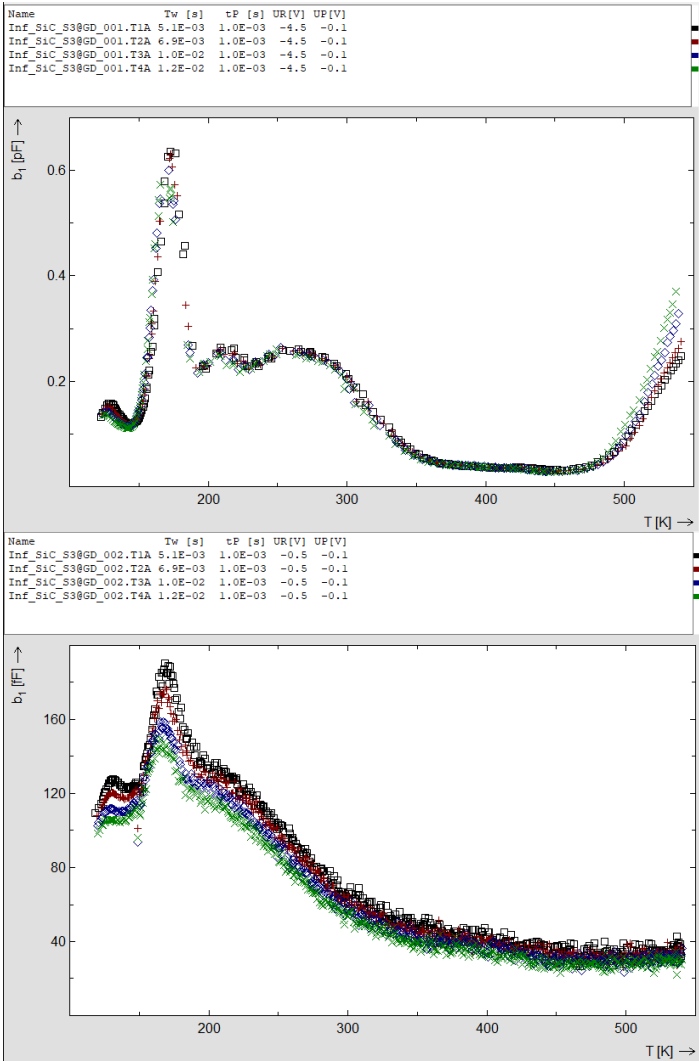



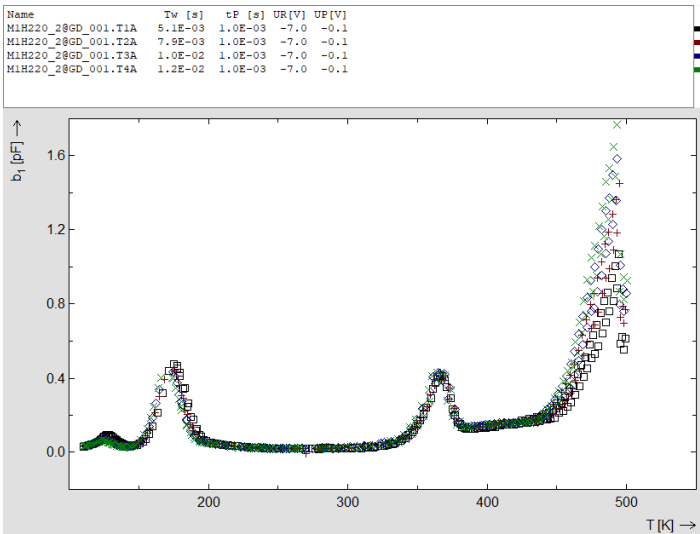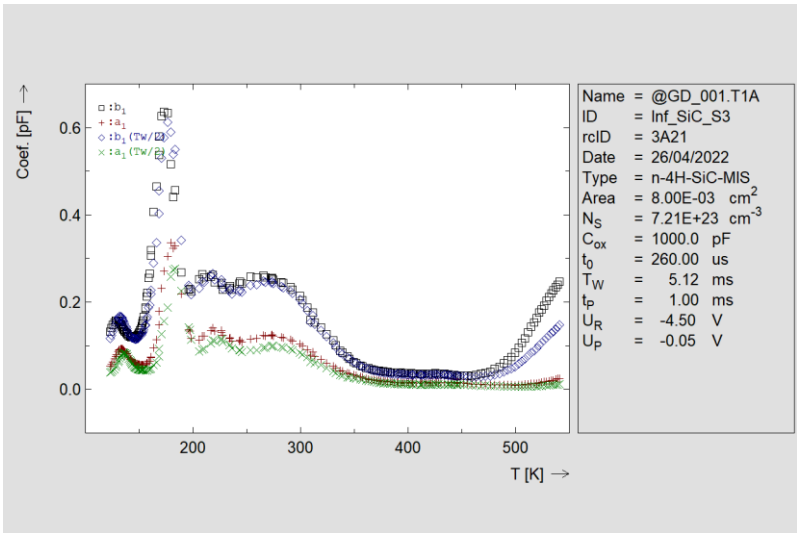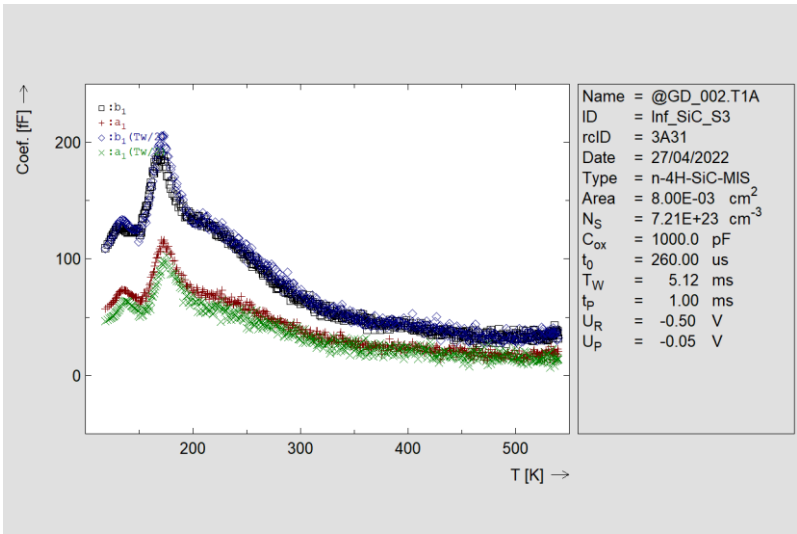

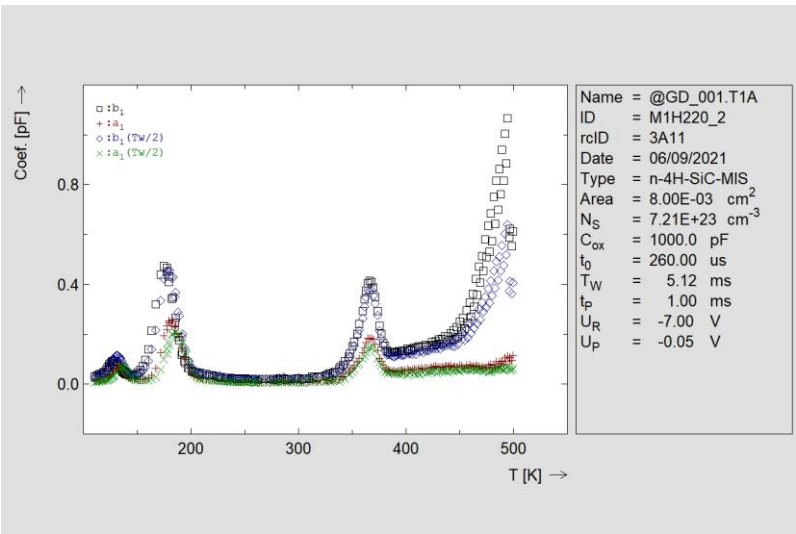

Measurements after 24 h of UIS stress

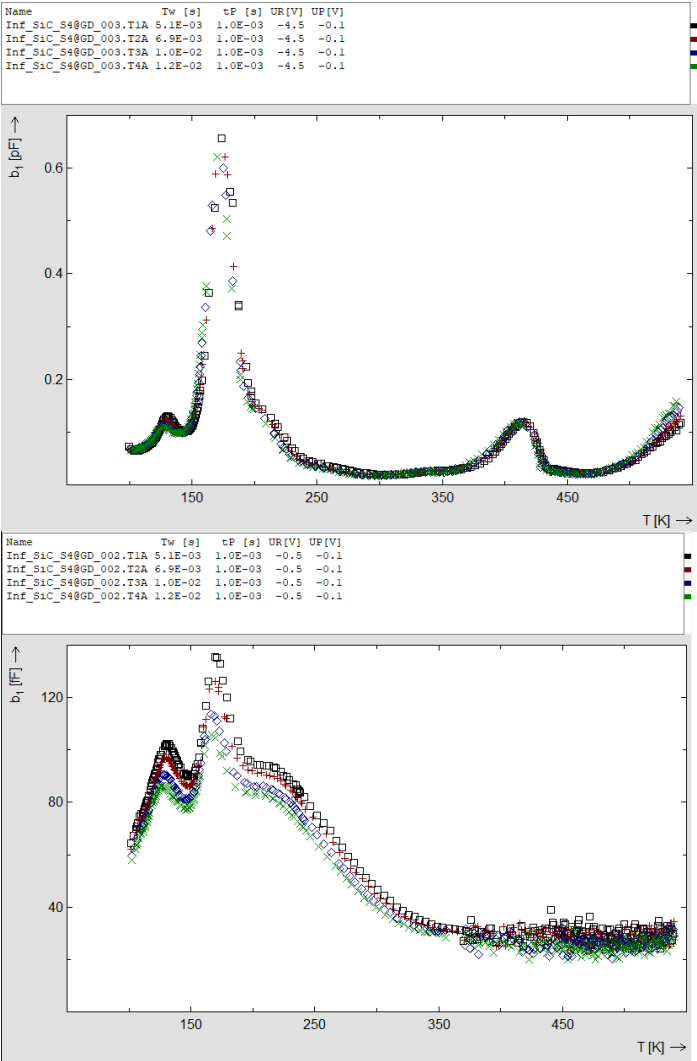

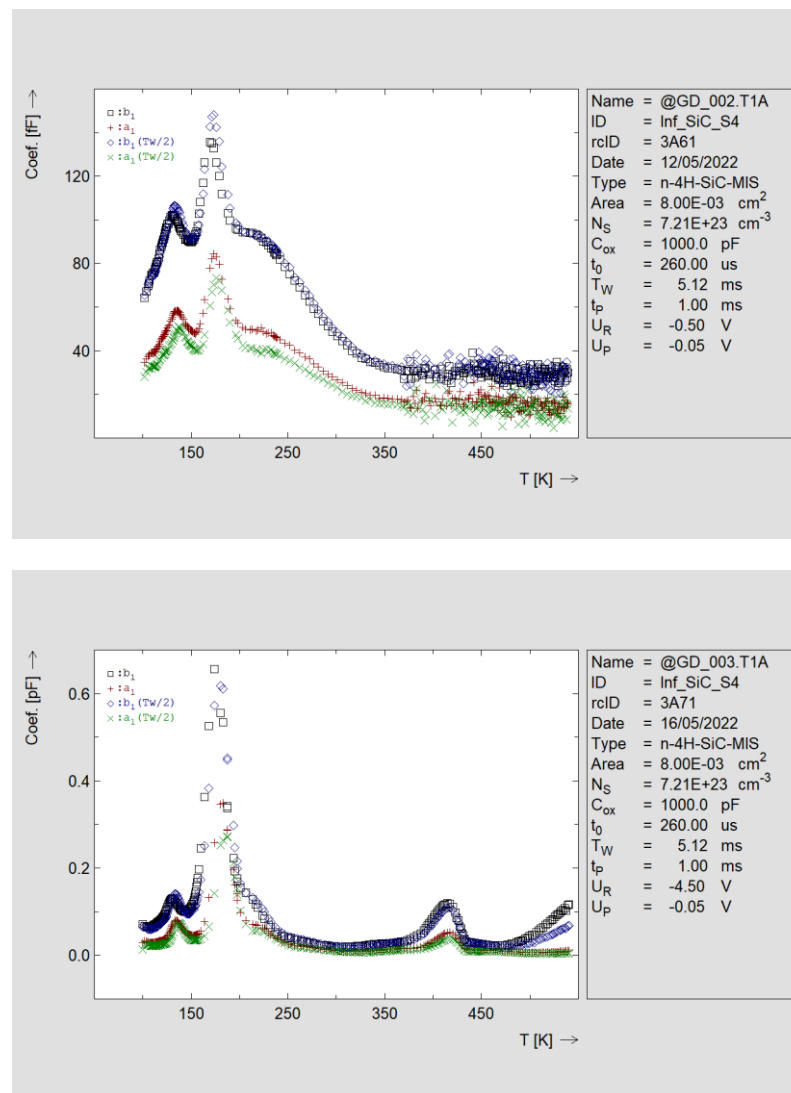

Static stress

**Figure S1.** Deep-level transient spectroscopy data.
